# Supplementary material
Source: PubMed Central journal article supplement (PMC3672937)
Supplement: supp_126.10.2213_JCS120519.pdf [file supp_126.10.2213_JCS120519.pdf]

Supplemental Figure 1.

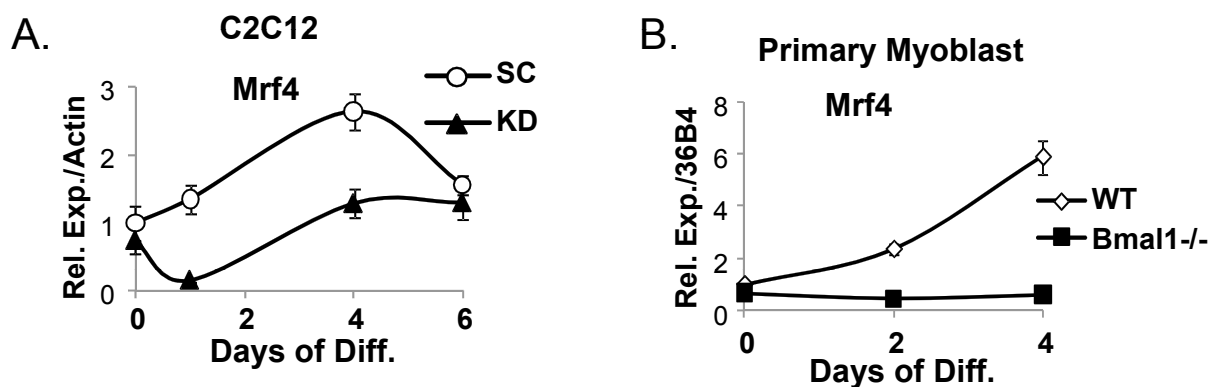

Fig.S1. RT-qPCR analysis of mRNA expression level of Mrf4 in C2C12 (A) and primary myoblasts (B) during myogenic differentiation. Values are expressed as fold change over control after normalization.

Supplemental Figure 2.

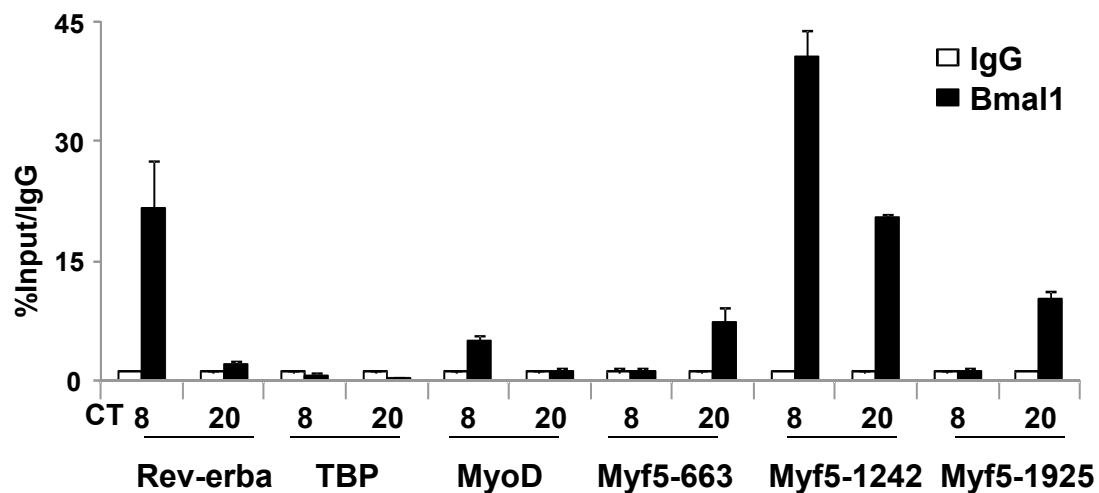

Fig.S2. ChIP-qPCR analysis of Bmal1 association with non-cononical E-box in MyoD core enhancer (as identified by Zhang et al. 2012), and three E-boxes (-663 CACGTG, -1242 CACGTG and -1925 CACATG, respectively) in Myf5 promoter. Values are expressed as fold enrichment of % input normalized to IgG control.

Table S1.

| <b>Genes</b>     |         | <b>Sequences</b>            |
|------------------|---------|-----------------------------|
| Actin            | Forward | CCACACCCGCCACCAGTTCG        |
|                  | Reverse | TACAGCCCGGGGAGCATCGT        |
| 36B4             | Forward | CGCTTTCTGGAGGGTGTCCGC       |
|                  | Reverse | TGCCAGGACGCGCTTGTACC        |
| Wnt10a           | Forward | CAACGCGTGCGCTCTGGGTA        |
|                  | Reverse | TGGCTCAAGCCCTTTCCGCG        |
| Dvl2             | Forward | TCAGTTTGCGGGTGTGCGCAG       |
|                  | Reverse | TTCGTCTCGCCTACACCACCG       |
| Fzd5             | Forward | AATCATGCAGGGGGCCCCGAA       |
|                  | Reverse | CGACAAGCTAGGTACCTGTGGCG     |
| TCF3             | Forward | AGGGCCTGCCAGGGACATCA        |
|                  | Reverse | GGATGGCCTCGTCCAAGCGG        |
| $\beta$ -catenin | Forward | CGCTTGGCTGAACCATCAC         |
|                  | Reverse | GTTCCGCGTCATCCTGATAGT       |
| MyoD             | Forward | TGGCATCCGGTGCAGTGCAG        |
|                  | Reverse | CCCTCCAGAAGGGTAGCACGCT      |
| Myf5             | Forward | AGCTGCTGAGGGAACAGGTGGA      |
|                  | Reverse | ATTCAGGCATGCCGTCAGAGCA      |
| Axin2            | Forward | TGACTCTCCTTCCAGATCCCA       |
|                  | Reverse | TGCCCACTAGGCTGACA           |
| Bmal1            | Forward | ACTCACCGTGCTAAGGATGGCTGT    |
|                  | Reverse | CTCGGAGACAAAGAGGATCTTCCCTCG |
| Myogenin         | Forward | GTCCCAACCCAGGAGATCATT       |
|                  | Reverse | AGTTGGGCATGGTTTCGTCT        |
| MHC3             | Forward | AAGGCCATCACTGACGCCGC        |
|                  | Reverse | CGCCAGCTGCTCAGCCTCAT        |
| MLC1             | Forward | GCAACAGGAGGACTTCAAGGAGGC    |
|                  | Reverse | ATTGGTGCCCAGAGCCCGGA        |
| Mrf4             | Forward | CCACAGATCGTCGGAAAGCA        |
|                  | Reverse | CAGTCTCTGGTTGGGGTTGG        |

Table S1. Primer sequences used for qPCR analysis.

Table S2.

| <b>Genes</b> |         | <b>Sequences</b>           |
|--------------|---------|----------------------------|
| TBP          | Forward | ACACTGCTGTTGGTGATTGTTGGTTT |
|              | Reverse | TGGGAAGGCGGAATGTATCTGGCA   |
| NR1D1        | Forward | TTCCCTGGGACAGAGGGCTCT      |
|              | Reverse | TACAAATCCCAACAATCCTGGCGGT  |
| MyoD1        | Forward | TGCTTCTTTCGGCCAAGTAT       |
|              | Reverse | CGGGTTTTAAGCTGAGCACT       |
| Myf5-P-663   | Forward | TCTGAGGTCTGGCTCTGTCA       |
|              | Reverse | GGAATCTCCCAGTGCAGGTA       |
| Myf5-P-1242  | Forward | CTCCACTGTTGATCCGCTTT       |
|              | Reverse | CCCAAGTGTGAACAGTCCATT      |
| Myf5-P-1925  | Forward | CACGCGTACTCCTGAAGACA       |
|              | Reverse | CAAAGAGAGAAGGAGCAAGAGG     |

Table S2. Primer sequences used for ChIP-qPCR analysis.
